# Application of Process Improvement Principles to Increase the Frequency of Complete Airway Management Documentation

L. Kelsey McCarty, M.S., M.B.A., Daniel Saddawi-Konefka, M.D., M.B.A., Lauren M. Gargan, B.S., William D. Driscoll, M.A., John L. Walsh, M.D., Robert A. Peterfreund, M.D., Ph.D.

## ABSTRACT

**Background:** Process improvement in healthcare delivery settings can be difficult, even when there is consensus among clinicians about a clinical practice or desired outcome. Airway management is a medical intervention fundamental to the delivery of anesthesia care. Like other medical interventions, a detailed description of the management methods should be documented. Despite this expectation, airway documentation is often insufficient. The authors hypothesized that formal adoption of process improvement methods could be used to increase the rate of “complete” airway management documentation.

**Methods:** The authors defined a set of criteria as a local practice standard of “complete” airway management documentation. The authors then employed selected process improvement methodologies over 13 months in three iterative and escalating phases to increase the percentage of records with complete documentation. The criteria were applied retrospectively to determine the baseline frequency of complete records, and prospectively to measure the impact of process improvements efforts over the three phases of implementation.

**Results:** Immediately before the initial intervention, a retrospective review of 23,011 general anesthesia cases over 6 months showed that 13.2% of patient records included complete documentation. At the conclusion of the 13-month improvement effort, documentation improved to a completion rate of 91.6% ( $P < 0.0001$ ). During the subsequent 21 months, the completion rate was sustained at an average of 90.7% (SD, 0.9%) across 82,571 general anesthetic records.

**Conclusion:** Systematic application of process improvement methodologies can improve airway documentation and may be similarly effective in improving other areas of anesthesia clinical practice. (ANESTHESIOLOGY 2014; 121:1166-74)

THE field of process improvement helps us close the “evidence-practice gap” where practitioners know what to do, but fail to do it.<sup>1</sup> Having a good solution to a problem is necessary but not sufficient in solving that problem. In a study by General Electric Corporation, 100% of practice changes evaluated as “successful” were found to have a good technical solution, although over 98% of “unsuccessful” changes also had a good technical solution.\* Process improvement methods help identify solutions to problems and, more importantly, implement them successfully.

Airway management is a medical intervention at the core of anesthesia care.<sup>2-9</sup> Like other medical interventions, a detailed description of the management methods should be documented. A previous survey of anesthesia records identified only partial completion of selected airway management data entry items.<sup>10</sup> This represents a loss of valuable information when patients present for future anesthetics, as subsequent anesthesia teams are unable to benefit from knowledge of previously successful airway management techniques. This disadvantage is magnified for patients with difficult airways.<sup>11-13</sup> These observations create a major impetus for improving documentation practices. Our institution therefore looked to process improvement methods to address

### What We Already Know about This Topic

- Detailed documentation of airway management during anesthesia induction is mandatory but in reality it is insufficient
- Process improvement science provides strategies and methods increasingly applied in health care with the aim to effectively decrease “evidence-practice” and “knowing-doing” gaps

### What This Article Tells Us That Is New

- At the Massachusetts General Hospital, a combination of iterative improvements through Plan-Do-Study-Act cycles, standardization of work flow, data sharing, and additional change management strategies improved the frequency of “complete” airway management documentation from a baseline of 13.2% to over 90% of records in 13 months
- Systematic study and application of formal process improvement strategies may similarly enable improvement in other institutions and in other areas of anesthesia practice

the deficiency in airway management documentation and hypothesized that formal implementation of these tools could improve our airway documentation practices.

One of the challenges of conducting process improvement is the lack of information regarding the optimal tool or strategy to use in medical environments. In this report, we describe the implementation of a process improvement

This article is featured in “This Month in Anesthesiology,” page 1A.

Submitted for publication February 27, 2014. Accepted for publication September 4, 2014. From the Department of Anesthesia, Critical Care, and Pain Medicine, Massachusetts General Hospital, Boston, Massachusetts.

\* Available at: <http://massleague.org/Calendar/LeagueEvents/ClinicalQualityConference/2013/C2ManagingforChange.pdf>. Accessed August 10, 2014.

Copyright © 2014, the American Society of Anesthesiologists, Inc. Lippincott Williams & Wilkins. Anesthesiology 2014; 121:1166-74

program and subsequent increase in the frequency of “complete” airway management documentation for patients receiving general anesthesia. We describe each of our many interventions and the corresponding process improvement theory or tool we used to achieve behavioral change. Our primary goal was to improve airway documentation, especially for patients with difficult airways, so that future caregivers can benefit from the information and be alerted to any special conditions. We also wanted to evaluate which process improvement techniques were effective in our department to learn how to more reliably approach future challenges in the delivery of anesthesia care that might also require systematic practice change.

We tested the hypothesis that a combination of process improvement methodologies, including iterative improvements through Plan-Do-Study-Act (PDSA) cycles,<sup>14,15</sup> standardization of work flow, data sharing, and additional change management strategies could improve the frequency of “complete” airway management documentation. These methods increased the frequency of complete documentation from a baseline of 13.2% to over 90% of records.

## Materials and Methods

This project was completed under approval of the Institutional Review Board at Massachusetts General Hospital, Boston, Massachusetts, for the purpose of this publication; however, the activities described herein would have otherwise met Institutional Review Board exemption criteria, including requirements regarding written/informed consent, given that this was a process improvement effort aimed at elevating quality of care rather than traditional clinical research.<sup>16</sup> A group of seven senior anesthesiologists used a consensus-driven process to initially define a set of necessary elements for “complete” airway documentation. These criteria were disseminated to all anesthesiologists in our department and further refined with their feedback. The final criteria for complete airway management documentation were incorporated into our electronic anesthesia record in the form of lists and checkboxes. The criteria included (1) specification of airway management methods (*e.g.*, spontaneous ventilation, mask, laryngeal mask airway, or endotracheal tube), (2) a description of ease of bag-mask ventilation, if attempted, and notation of any mask adjuncts used, (3) details of tracheal tube insertion (*i.e.*, method, instrument, or adjunct), if attempted, and (4) if intubation was attempted, notation of whether the intubation was difficult or atraumatic (fig. 1). If “difficult intubation” was checked as “yes,” a text display with “Please confirm with attending” would appear below the field (fig. 2) and an automated e-mail with follow-up instructions would be sent to the supervising anesthesiologist. Clinicians were asked to practice concurrent documentation and complete all record entries before the end of the case, but had up to 2 weeks to edit the record before it became permanently archived. Efforts to increase adoption

of these criteria were applied in three phases using PDSA continuous improvement cycles that allowed for testing and refining of improvement strategies (table 1).<sup>14,15</sup>

### Phase I/PDSA Cycle 1

Baseline compliance data were retrospectively captured based on the criteria for “complete” airway documentation. A new airway documentation form with a more intuitive layout that reflected clinician workflow was custom-created for our anesthesia information management system (MetaVision; iMDSoft, Dedham, MA) (fig. 3). One field, a designation of “yes” or “no” for “difficult intubation,” was forced (*i.e.*, users could not proceed without completing it). Attending anesthesiologists were asked to determine the appropriateness of the “difficult intubation” designation based on education provided of existing definitions in the literature<sup>11,17–26</sup> and clinical judgment. Department-wide education included in-person training (including lunch talks near the operating rooms to increase participation), creation of a conceptual flow chart (fig. 1), and Web-based video instruction on how to use the new form and successfully document all the new required criteria. Clinician feedback and general attitudes toward the new airway documentation criteria were also collected over the training period both verbally during operating room education sessions and *via* e-mail in response to written communications. Aggregate completion rates were shared with department clinicians in weekly e-mail updates. Finally, the project was linked to a hospital Quality Incentive Program that would award all attending-level physicians with a small payment if at least 50% of the department’s records of general anesthetics contained complete airway documentation at the end of a 4-week measurement period.

### Phase II/PDSA Cycle 2

The 18 weeks after the end of the phase I implementation (Do) were used to review (Study) and respond to (Act) clinician feedback and develop a subsequent plan (Plan) for phase II. Two information technology tools were built into the anesthesia information management system to provide clinicians with real-time airway documentation guides. One tool highlighted empty fields that required data input. The second tool was a real-time user query that reported whether airway documentation was complete. Education efforts continued with updated video and in-person trainings and clinicians were asked for additional feedback. The hospital Quality Improvement Program also offered a second financial incentive if clinicians collectively achieved a new target of 75% of records with complete airway documentation at the end of a 9-week measurement period.

### Phase III/PDSA Cycle 3

New clinician feedback from phase II was reviewed and used to “Plan” the next iteration of behavioral improvement over the 19 weeks leading up to the next “Do” step of phase III. Process improvement leaders shared confidential reports on

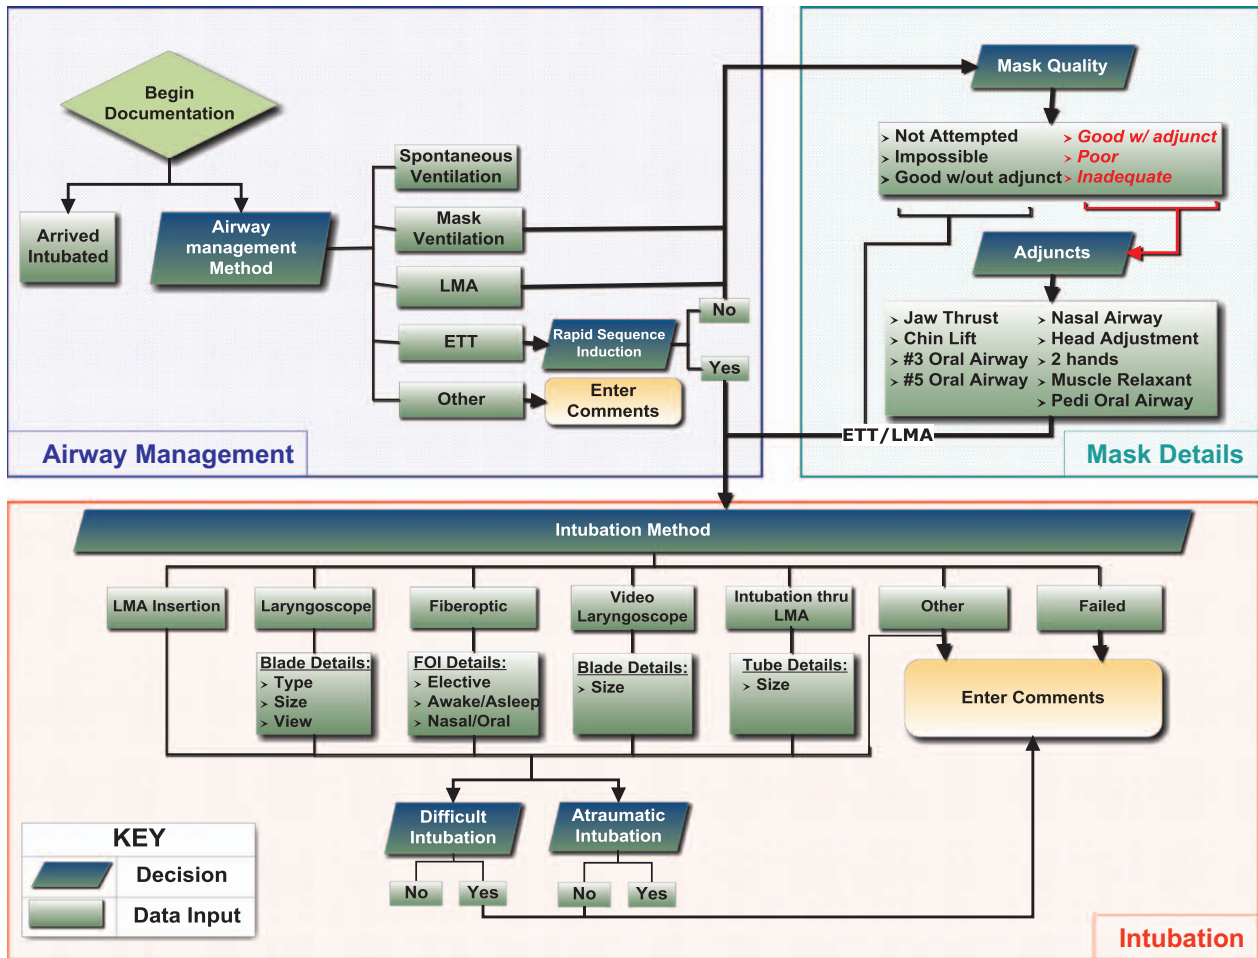

**Fig. 1.** Airway documentation flow chart showing required fields to meet the minimum department documentation standard. ETT = endotracheal tube; FOI = fiberoptic intubation; LMA = laryngeal mask airway.

a monthly basis *via* an electronic dashboard. These reports showed individual performance compared to the department aggregate. Records marked as incomplete specifically told clinicians what needed to be added to be considered complete. The hospital Quality Improvement Program offered a third and final incentive payment if clinicians collectively included complete airway documentation in at least 90% of records. Following phase III, passive interventions (anesthesia information management system documentation decision support and ability to review monthly completion reports) were kept in place whereas active interventions (training, communication, and financial incentives) were discontinued.

### Statistical Analysis

Compliance data were summarized by mean on monthly or weekly intervals during each stage. We tracked performance during the project using a P-Statistical Process Control Chart. We set control limits at 3 SDs from the mean assuming a binomial distribution. In addition, a generalized linear model was used to assess the linear trend of compliance rate over the progression of each phase. Statistical significance was declared

at  $P$  value less than 0.05. Statistical analyses were performed using SAS(R) (version 9.3, Cary, NC), Excel(c) and Access(c) (Microsoft Corporation, Redmond, WA).

### Results

In phase I, a retrospective review of baseline airway documentation revealed that 13.2% of 23,011 general anesthetic records met all criteria for the new definition of complete airway documentation (see first paragraph in Materials and Methods). A total of 49.8% of records included partial airway documentation, and 37.0% did not have any documentation of airway management. Expected but missing data elements were counted for each incomplete record. The most frequent reason for incomplete documentation was failure to note whether intubation was difficult (fig. 4).

At the end of phase I, the rate of complete documentation reached 66.3%; more than a fivefold increase over baseline. Completion rates increased to a mean of 84.4% over phase II and 90.0% over phase III (fig. 5). A linear trend test demonstrated improvement in each of the three phases of implementation ( $P < 0.0001$ ). In the 21 months that followed after the conclusion of phase III, the airway documentation



**A**

Difficult Intubation? ☐ Yes ☐ No

Atraumatic Intubation? ☐ Yes ☐ No

Intubation Comment

**B**

Difficult Intubation? ☒ Yes ☐ No

Please confirm with attending

Atraumatic Intubation? ☐ Yes ☐ No

Intubation Comment

**Fig. 2.** (A) “Difficult Intubation” and “Atraumatic Intubation” fields are in red text to indicate that they are required fields to meet the “complete” airway management documentation criteria. (B) When “Difficult Intubation” is checked “Yes,” the text “Please confirm with attending” appears and the color of the “Intubation Comment” prompt changes from black to red indicating that this is now also a required field.

completion rate was sustained at an average of 90.7% (SD, 0.9%) across 82,571 general anesthetic records.

## Discussion

Airway management is fundamental to the delivery of anesthesia care. Despite this widespread appreciation, our baseline airway documentation completion rate of 13.2% indicates that behavioral changes were necessary. The goal of this work was to test the use of process improvement as a means to improve documentation of airway management details. In the 13 months of this project, the percent of records that met our local criteria for “complete” airway documentation increased to a sustained rate of over 90%. This success was achieved with a multipronged approach that included three distinct phases and the application of process improvement principles (tables 1 and 2).

Each phase, or PDSA cycle, required a different set of process improvement and change management strategies tailored to the specific state of the project and shifting perceptions, behaviors, and attitudes of the clinicians. For example, initial feedback indicated that the majority of clinicians supported the idea of better documentation, possibly because baseline documentation completion rates were very low. This allowed us to focus phase I primarily on simplifying work flow with a new documentation form and providing education on the criteria, as opposed to building buy-in, which is often otherwise required in the early phases of project implementation.

Developing a set of criteria before phase I provided an explicit shared goal, which is a critical starting point. In addition, having defined criteria also allowed us to decrease

the variability in anesthesiologist reports that occurred due to their individualized practices. It is essential to recognize that this effort did not aim to change airway management practices; the aim was to improve documentation of the procedure to manage the airway.

Standardization and low variability are key to high efficiency and high quality in systems-based practices. The specific elements chosen for the criteria are less important than defining them by consensus and ensuring acceptance and knowledge of the definition. To compare results nationally, however, there should be an effort made to get a consensus regarding these criteria.

In phase I, we began deploying a new documentation form that was more intuitive and followed the workflow completed by the anesthesiologists. This lowered a barrier to change and helped embed the new desired practice into existing workflow, which is another critical step in successful process improvement.

In addition, we began measuring performance and sharing data with the department. This likely resulted in improvement due to the Hawthorne effect, whereby workers change performance solely due to the fact that they are being observed.<sup>27</sup> Finally, in our phase I educational efforts, we focused on the need to document a “yes” or “no” for difficult intubation and atraumatic intubation, the management method and, if used, the quality of the bag-mask ventilation. These four elements (33% of all elements in the criteria) accounted for 79% of missing documentation at baseline. This is an example of the “Pareto Principle,” coined by Joseph M. Juran (Department of Industrial Engineering, New York University, New York, New York, 1904–2008) in the 1940s as “the vital few and trivial many.”<sup>28</sup> Also called the “80/20 rule,” it posits that often 80% of the effects, or problems, are caused by only 20% of the causative factors.<sup>29–31</sup> As a result of applying these principles in phase I, completion rates rose from 13.2 to 66.3% in just 4 weeks.

In studying phase I, we learned that many clinicians felt overwhelmed by the need to memorize the details of the criteria and wanted real-time feedback when documentation was complete. In response, we built decision support tools into the new documentation form as part of our phase II iterative improvements. The rate of improvement in phase II decreased from the rapid improvement in phase I. This is characteristic of the principle of “diminishing returns” which states that greater effort is required for each degree of improvement as the 100% target approaches.

The diminishing returns phenomenon was even more pronounced in phase III, which had a target completion rate of 90%. Individual performance reports were used to close the final performance gap of less than four percentage points. Sharing individual data to drive improvement has been previously demonstrated in anesthesia care.<sup>32</sup> Feedback in phase II indicated that many clinicians incorrectly perceived their individual performance as above the departmental average. The individual reports clearly identified which clinicians

**Table 1.** Plan-Do-Study-Act Cycles of the Airway Management Documentation Initiative

|                 |           |                                                                                                                                                                                                                                                                                       |
|-----------------|-----------|---------------------------------------------------------------------------------------------------------------------------------------------------------------------------------------------------------------------------------------------------------------------------------------|
| Preintervention | Plan/Do   | Drafted local criteria for “complete” airway management documentation. Shared draft criteria with department clinicians and collected feedback: <i>Strong support for better documentation; mixed support for specific proposed criteria.</i>                                         |
|                 | Act       | Incorporated suggestions and completed final draft of criteria. Measured retrospective baseline compliance.                                                                                                                                                                           |
|                 | PI theory | Low compliance due to lack of defined and articulated expectation for airway documentation (hazard of high variability).                                                                                                                                                              |
| Phase I         | Plan/Do   | Revised layout of form to make documentation of new criteria easier. Educated department on new criteria <i>via</i> in-person, e-mailed/written, and video tutorial mediums.                                                                                                          |
|                 | Study     | Evaluated themes in clinician feedback: <i>Airway documentation is important and needs to be improved; Criteria too complex to remember; Strong desire for real-time feedback in AIMS.</i>                                                                                            |
|                 | Act       | Continued implementation of new documentation criteria while considering ways to reduce difficulty of remembering criteria and provide real-time information on completeness.                                                                                                         |
|                 | PI theory | Showing baseline data had an immediate impact on perception of and response to the problem (Hawthorne effect). Focusing education on top few most frequently missing criteria led to rapid improvement with relatively little effort (Pareto principle, or the “80/20 rule”; fig. 3). |
| Phase II        | Plan/Do   | Shared weekly “bite-size” tips on how to improve documentation. Built decision support into AIMS for real-time documentation guidance and on-demand record auditing.                                                                                                                  |
|                 | Study     | Clinician self-assessments of documentation completeness rates much higher than reality. Frequent incorrect perception that colleagues were more at fault for incomplete records.                                                                                                     |
|                 | Act       | Considered ways to provide data on individual clinician performance.                                                                                                                                                                                                                  |
|                 | PI theory | Continued education efforts began to have reduced effectiveness. More sophisticated tools needed to address remaining reasons for incomplete documentation. Increasingly greater efforts required for smaller gains in improved documentation (law of diminishing returns).           |
| Phase III       | Plan/Do   | Shared confidential clinician reports show individual performance compared to the department aggregate. Records marked as “incomplete” included the reason why.                                                                                                                       |
|                 | Study     | Individual data was effective in creating clinician awareness about remaining documentation deficiencies and focusing final improvement efforts.                                                                                                                                      |
|                 | Act       | Made new criteria, form, and monthly reports permanent.                                                                                                                                                                                                                               |
|                 | PI theory | Iterative improvements promoted implementation of new criteria and complete documentation became a new cultural norm (change must be embedded into existing work flow).                                                                                                               |

AIMS = anesthesia information management system; PI = process improvement.

needed focused communication and additional education on improving airway documentation and helped us achieve our goal of a sustained 90% completion rate.

Although the 80/20 rule leads to fast gains initially, it can also lead to discouragement as the ratio eventually flips and a large amount of effort and resources are required to close a small final gap in performance. From one perspective, we should never settle for a target that is less than 100%. From another perspective, balancing resource expenditure with modest potential benefit (achieving 100% from a level close to 100%) is a very real decision that many groups need to make in the era of increasingly limited resources and should be carefully considered.

Our combined methods allowed us to create a “high-reliability” practice<sup>33</sup> where even as active project management, incentives, education, reminders, and all other activities requiring a workforce were discontinued, the department sustained documentation rates at peak performance.

It is possible that we could have reached our 90% goal more quickly if we had not allowed the anesthesiologist to exit the airway documentation form without completing all

the necessary fields. However, with all process improvement initiatives, it is important to balance expected benefit with expected burden of planned interventions. Ultimately, we felt the tactic of forcing fields could become a distraction or prevent clinicians from accessing the stat paging, blood ordering, and lab results screens quickly in the event of an urgent or emergent issue. The concept of forced fields was also disliked by clinicians.

The financial incentive payments for achieving our targets were part of an externally funded pay-for-performance program in which our department was obligated to participate. This aspect of our intervention was relatively de-emphasized compared to the objectives of provider preparation and patient safety, which may in part explain the sustained compliance at peak performance despite the discontinuation of financial incentives after March 2012. At the same time, this project could have potentially been completed over a shorter timeline but we were tied to the hospital pay-for-performance intervals which were administered on 6-month cycles and based on group, rather than individual, performance.

**Fig. 3.** Airway documentation form in the local anesthesia information management system with (A) quick reference link to the airway documentation criteria flow chart, (B) smart logic that automatically highlights section headers to indicate when required fields have not yet been completed, and (C) an airway documentation check button that runs a real-time audit of documentation completeness and prompts the user to complete any missing fields. AIMS = anesthesia information management system; ETT = endotracheal tube; LMA = laryngeal mask airway.

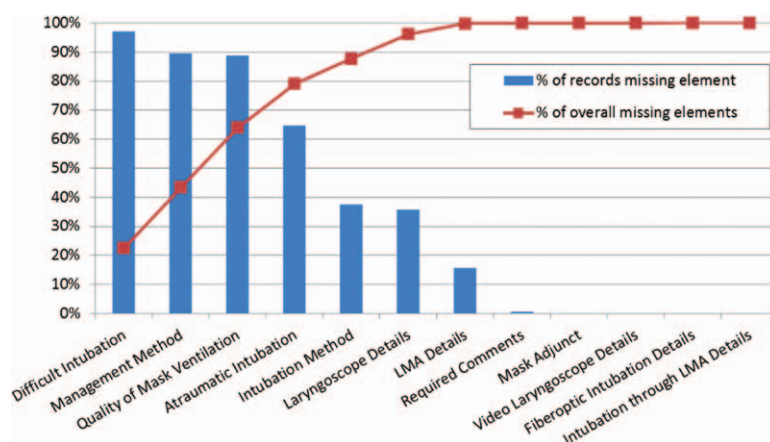

**Fig. 4.** Reasons for incomplete airway management documentation at baseline (Pareto Principle). The blue bars show how often each documentation element was missing from 23,011 general anesthesia records at baseline performance. They are ordered from most to least frequently missing from the records. The red line shows how many records would have been considered “complete” if the element had not been omitted. It is cumulative across the different elements. The Pareto Principle, as it is applied to process improvement, states that approximately 80% of the problem is caused by 20% of the contributing factors. In this case, the first four elements (~30% of all elements listed) are responsible for ~80% of incomplete records. LMA = laryngeal mask airway.

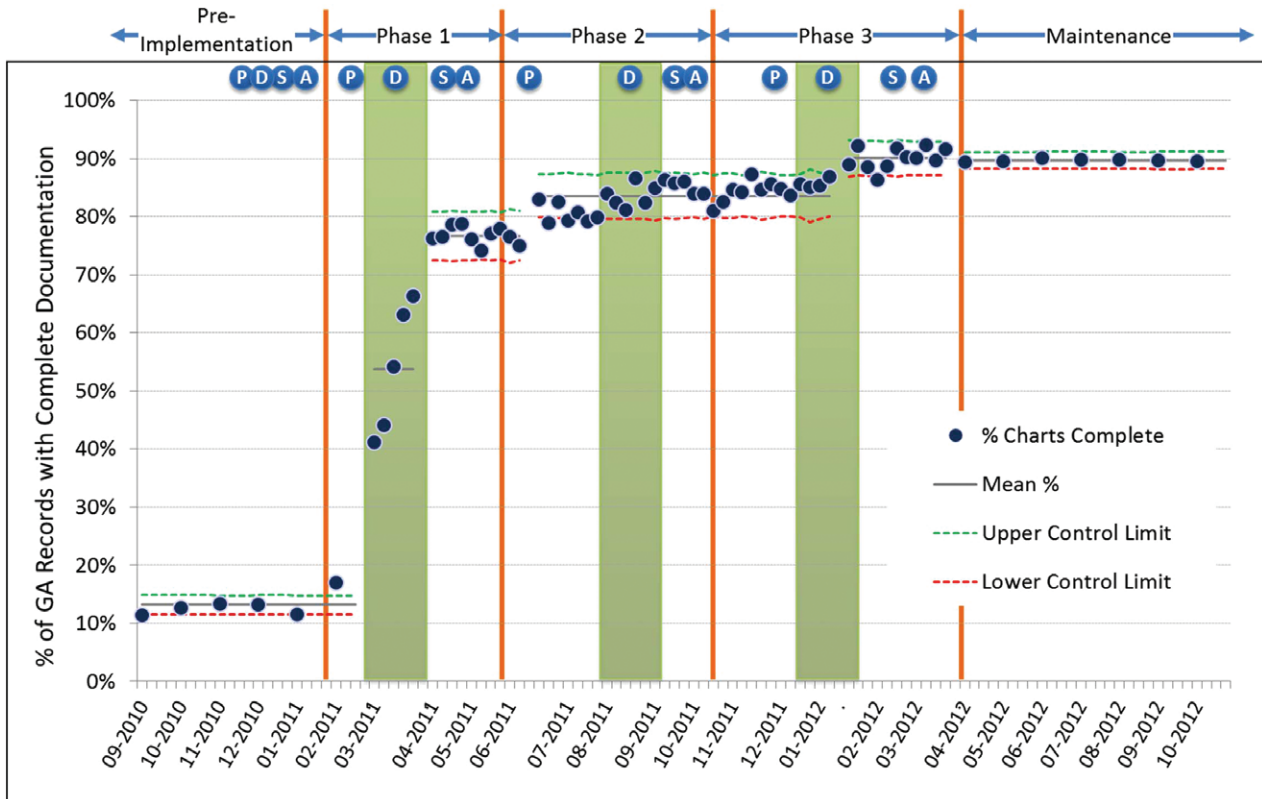

**Fig. 5.** Percent of general anesthesia (GA) cases with “complete” airway management documentation relative to each step of the three Plan-Do-Study-Act (PDSA) improvement cycles. Data shown with a P-Statistical Process Control Chart with control limits at 3 SDs from the mean assuming a binomial distribution.

There are limitations to process improvement that should be weighed carefully in each “Plan” step of improvement efforts. The first is the limitation of metric definitions used to track performance. These definitions are typically binary or categorical to enable discrete measurement. In this example of airway documentation, we were not able to include free text comments in the automated data query for complete records. Therefore records that had thorough written descriptions but missing entries in the provided drop down boxes were counted as incomplete by the computer system. Baseline data showed that this occurred in less than 5% of cases—low enough for us to accept the trade-off of not being able to manually count and include these records in our monthly data collection. It is important to know the limitations of the plan, but not allow them to paralyze improvement efforts.

The second limitation is that process improvement focuses on *process*. Process metrics are strongest when designed in connection with an outcome metric, but outcomes are generally more difficult to measure and require substantially more power to discern statistical effect. Our primary objective in improving airway documentation was to increase the likelihood of having detailed information that would better prepare future anesthesia teams providing care for patients returning for surgery. This information might alter an airway management plan and, as a result, lead to fewer intubation attempts, less trauma to the airway, less desaturation and lower airway management-related

mortality. The information could also be useful for emergency department and intensive care unit teams needing to secure an airway quickly or transition a patient to mechanical ventilation. Although these potential downstream benefits of detailed airway management information are a logical extrapolation, the actual impact our documentation practices had on these types of events is difficult to determine. The difficulty of measuring this impact, however, should not negate the importance of improving processes. In addition to potentially driving better outcomes, a secondary practical advantage of process measures is that they often satisfy external requirements for performance tracking, like the Joint Commission’s Ongoing Professional Practice Evaluation program or pay-for-performance initiatives driven by insurance carriers.

A third limitation is best described in a study by Davidoff where it is noted that improvement efforts are “hard to standardise, since they are most effective when adapted to the local circumstances.”<sup>34</sup> In the “Plan” step of each phase, the interventions we ultimately chose to trial in the “Do” step were the ones that best accounted for the constraints and options specific to our institution. For example, we did not have control over the amount or manner in which the incentives were paid, but we did have the ability to customize our anesthesia information management system and therefore focused on the latter. The specific interventions chosen to improve airway management at another institution may be



**Table 2.** Localized Improvement Activities Mapped to Generalizable Process Improvement Principles

| Process Improvement Activities                                                                                                                                                                                                                                                | General Process Improvement Principles <sup>14</sup>                                                                                                                                                                                                                                                                                                                                                                                |
|-------------------------------------------------------------------------------------------------------------------------------------------------------------------------------------------------------------------------------------------------------------------------------|-------------------------------------------------------------------------------------------------------------------------------------------------------------------------------------------------------------------------------------------------------------------------------------------------------------------------------------------------------------------------------------------------------------------------------------|
| <ul style="list-style-type: none"> <li>Defined “complete” with respect to documentation and developed a methodology and tools to track this outcome.</li> </ul>                                                                                                               | <p><b>Clear definitions:</b> For change to occur, clear goals and definitions are necessary on the local level, even if widely accepted standards do not exist.<sup>35–38</sup></p> <p><b>Objective metrics:</b> Rigorous objective assessment metrics that can be readily tracked are necessary.</p> <p><b>Hawthorne effect:</b> Explicitly tracking quality improves quality even without rigorous intervention.<sup>27</sup></p> |
| <ul style="list-style-type: none"> <li>Collected and shared baseline data. Discovered mismatch between reality and clinician perceptions. Based on clinician feedback, determined that persuasion was less important than communication and workflow optimization.</li> </ul> | <p><b>Current state assessment:</b> Baseline status must be understood. This facilitates goal setting and helps inform which process improvement strategies are likely to be most useful.</p>                                                                                                                                                                                                                                       |
| <ul style="list-style-type: none"> <li>The majority of records at baseline were “incomplete” due to only a few missed criteria.</li> </ul>                                                                                                                                    | <p><b>Pareto principle (“80/20 rule”):</b> Approximately 80% of the effect comes from 20% of the causes.<sup>28</sup></p>                                                                                                                                                                                                                                                                                                           |
| <ul style="list-style-type: none"> <li>Re-engaged clinicians on required criteria for airway documentation. Substantial education and communication with in-person training.</li> </ul>                                                                                       | <p><b>Communication:</b> Communication, education, and training with feedback should never be shortchanged. They are often underdone.</p>                                                                                                                                                                                                                                                                                           |
| <ul style="list-style-type: none"> <li>Communicated specific compliance goals (50% for phase 1, 75% for phase 2, and 90% for phase 3) with timelines.</li> </ul>                                                                                                              | <p><b>Clear goals:</b> Widely communicated and understood goals are imperative.<sup>35–38</sup></p>                                                                                                                                                                                                                                                                                                                                 |
| <ul style="list-style-type: none"> <li>Implemented a more intuitive documentation form.</li> </ul>                                                                                                                                                                            | <p><b>Streamlining:</b> Simplifying processes lowers resistance to change.</p>                                                                                                                                                                                                                                                                                                                                                      |
| <ul style="list-style-type: none"> <li>Developed IT tools to minimize time spent documenting and provide real-time documentation assistance.</li> </ul>                                                                                                                       | <p><b>Embedded solutions:</b> More embedded solutions (natural to the workflow) lead to higher reliability systems and increased sustainability.</p>                                                                                                                                                                                                                                                                                |
| <ul style="list-style-type: none"> <li>Forced “yes/no” response for “difficult intubation?”</li> </ul>                                                                                                                                                                        | <p><b>Force:</b> Using force creates a risk of disengaging staff and may impose more burden than benefit. This is the opposite of an embedded solution. This tactic is useful for low stakes initiatives with high initial buy-in that do not over-burden workflow.</p>                                                                                                                                                             |
| <ul style="list-style-type: none"> <li>Implemented a financial incentive through a hospital Quality Incentive Program for anesthesiologists in aggregate.</li> </ul>                                                                                                          | <p><b>Incentives:</b> Though not as effective for long-term change, financial (and other) incentives are often useful tactics to initially persuade staff to engage with change.<sup>39</sup></p>                                                                                                                                                                                                                                   |
| <ul style="list-style-type: none"> <li>Tracked and shared compliance rates weekly; distributed biweekly individual performance reports in phase 3.</li> </ul>                                                                                                                 | <p><b>Illusory superiority:</b> Self-assessment usually overestimates individual performance.<sup>40</sup></p>                                                                                                                                                                                                                                                                                                                      |

IT = information technology.

different depending on the unique constraints and options of each location. Although tailoring process improvement efforts to local need and culture is critical, case studies of generalizable principles may be helpful to institutions facing similar challenges and seeking similar results.

Our experience suggests that systematic application of formal process improvement strategies improves completion rates for airway management documentation in electronic anesthesia records. Applying such methods may similarly enable improvement in other areas of anesthesia practice, and future study is warranted.

## Acknowledgments

The authors thank the Department Chair, Jeanine Wiener-Kronish, M.D., Department of Anesthesia, Critical Care, and Pain Medicine, Massachusetts General Hospital, Boston, Massachusetts, for supporting this work. The authors also extend their sincere gratitude to Shaji Anupama, B.Tech., Micah Flynn, B.A., Gopi Gogada, M.C.A., Mikaela Hoxhalli-Pine, B.S., Karen Kan, M.H.Sc., Diane Kostka, M.H.Sc., Milcho Nikolov, M.S., Lauren Smith, B.S., Morgan Templeton, B.S., and Kalpan Tolia, B.C.O.M., P.G.P.I.T. (The Clinical IT Systems Team, Department of Anesthesia, Critical

Care, and Pain Medicine, Massachusetts General Hospital), for developing the decision support and electronic data reporting that supported this project. The authors also thank Fred Millham, M.D., M.B.A. (Department of Surgery, South Shore Hospital, South Weymouth, Massachusetts), K. Trudy Poon, M.S. (Department of Anesthesia, Critical Care, and Pain Medicine, Massachusetts General Hospital), and Victoria Carballo, M.P.H. (Department of Quality, Safety and Value, Partners Healthcare, Boston, Massachusetts), for assistance with statistical analysis, and Melissa Connors, B.A. (Department of Anesthesia, Critical Care, and Pain Medicine, Massachusetts General Hospital), for assisting with the in-person training sessions.

Support was provided solely from institutional and/or departmental sources.

## Competing Interests

The authors declare no competing interests.

## Correspondence

Address correspondence to Ms. McCarty: Department of Anesthesia, Critical Care, and Pain Medicine, Massachusetts General Hospital, 55 Fruit Street, GRJ-447, Boston, Massachusetts. Lkmcarty@mgh.harvard.edu. This article may be



accessed for personal use at no charge through the Journal Web site, [www.anesthesiology.org](http://www.anesthesiology.org).

## References

1. Glasziou P, Ogrinc G, Goodman S: Can evidence-based medicine and clinical quality improvement learn from each other? *BMJ Qual Saf* 2011; 20(suppl 1):i13–17
2. Nolan JP, Soar J: Airway techniques and ventilation strategies. *Curr Opin Crit Care* 2008; 14:279–86
3. Marco CA, Marco AP: Airway adjuncts. *Emerg Med Clin North Am* 2008; 26:1015–27
4. Luba K, Cutter TW: Supraglottic airway devices in the ambulatory setting. *Anesthesiol Clin* 2010; 28:295–314
5. Levitan RM, Heitz JW, Sweeney M, Cooper RM: The complexities of tracheal intubation with direct laryngoscopy and alternative intubation devices. *Ann Emerg Med* 2011; 57:240–7
6. Jolliffe L, Jackson I: Airway management in the outpatient setting: New devices and techniques. *Curr Opin Anaesthesiol* 2008; 21:719–22
7. Hernandez MR, Klock PA Jr, Ovassapian A: Evolution of the extraglottic airway: A review of its history, applications, and practical tips for success. *Anesth Analg* 2012; 114:349–68
8. Thong SY, Lim Y: Video and optic laryngoscopy assisted tracheal intubation—The new era. *Anaesth Intensive Care* 2009; 37:219–33
9. Agrò FE, Cataldo R, Mattei A: New devices and techniques for airway management. *Minerva Anesthesiol* 2009; 75:141–9
10. Driscoll WD, Columbia MA, Peterfreund RA: An observational study of anesthesia record completeness using an anesthesia information management system. *Anesth Analg* 2007; 104:1454–61
11. Practice guidelines for management of the difficult airway: A report by the American Society of Anesthesiologists Task Force on Management of the Difficult Airway. *ANESTHESIOLOGY* 1993; 78:597–602
12. Baker PA, Flanagan BT, Greenland KB, Morris R, Owen H, Riley RH, Runciman WB, Scott DA, Segal R, Smithies WJ, Merry AF: Australian and New Zealand College of Anaesthetists: Equipment to manage a difficult airway during anaesthesia. *Anaesth Intensive Care* 2011; 39:16–34
13. Hagberg CA, Vogt-Harenkamp CC, Iannucci DG: Successful airway management of a patient with a known difficult airway with the Direct Coupler Interface Video Laryngoscope. *J Clin Anesth* 2007; 19:629–31
14. Langley GJ: *The Improvement Guide: A Practical Approach to Enhancing Organizational Performance*, 2nd edition. San Francisco, Jossey-Bass, 2009
15. Nelson EC, Batalden PB, Godfrey MM: *Quality by Design: A Clinical Microsystems Approach*, 1st edition. San Francisco, Jossey-Bass, 2007
16. Lynn J, Bailly MA, Bottrell M, Jennings B, Levine RJ, Davidoff F, Casarett D, Corrigan J, Fox E, Wynia MK, Agich GJ, O'Kane M, Speroff T, Schyve P, Batalden P, Tunis S, Berlinger N, Cronenwett L, Fitzmaurice JM, Dubler NN, James B: The ethics of using quality improvement methods in health care. *Ann Intern Med* 2007; 146:666–73
17. Cormack RS, Lehane J: Difficult tracheal intubation in obstetrics. *Anaesthesia* 1984; 39:1105–11
18. Koh LK, Kong CE, Ip-Yam PC: The modified Cormack-Lehane score for the grading of direct laryngoscopy: Evaluation in the Asian population. *Anaesth Intensive Care* 2002; 30:48–51
19. Rocke DA, Murray WB, Rout CC, Gouws E: Relative risk analysis of factors associated with difficult intubation in obstetric anaesthesia. *ANESTHESIOLOGY* 1992; 77:67–73
20. Adnet F, Racine SX, Borron SW, Clemessy JL, Fournier JL, Lapostolle F, Cupa M: A survey of tracheal intubation difficulty in the operating room: A prospective observational study. *Acta Anaesthesiol Scand* 2001; 45:327–32
21. Cook TM: A new practical classification of laryngeal view. *Anaesthesia* 2000; 55:274–9
22. Diemunsch P, Langeron O, Richard M, Lenfant F: [Prediction and definition of difficult mask ventilation and difficult intubation: Question 1. Société Française d'Anesthésie et de Réanimation]. *Ann Fr Anesth Reanim* 2008; 27:3–14
23. Karkouti K, Rose DK, Wigglesworth D, Cohen MM: Predicting difficult intubation: A multivariable analysis. *Can J Anaesth* 2000; 47:730–9
24. Kheterpal S, Han R, Tremper KK, Shanks A, Tait AR, O'Reilly M, Ludwig TA: Incidence and predictors of difficult and impossible mask ventilation. *ANESTHESIOLOGY* 2006; 105:885–91
25. L'Hermite J, Nouvellon E, Cuvillon P, Fabbro-Peray P, Langeron O, Ripart J: The simplified predictive intubation difficulty score: A new weighted score for difficult airway assessment. *Eur J Anaesthesiol* 2009; 26:1003–9
26. Souvatzis X, Askitopoulou H: Definition of difficult tracheal intubation. *Eur J Anaesthesiol* 2008; 25:694–5
27. Snow CE: Research on industrial illumination: A discussion of the relation of illumination intensity to productive efficiency. *Tech Engineering News* 1927; 8:257–82
28. Hindle T: *Guide to Management Ideas and Gurus*. London, Profile, 2008
29. Surgeons and the 20–80 rule. *Br Med J* 1977; 1:2
30. Ludwig G: The 80/20 rule. *JEMS* 2006; 31:22
31. Robertson B, Newitt Z: Leveraging the 80/20 rule to drive performance improvement. *Revenue-cycle Strateg* 2008; 5:3–4
32. Vigoda MM, Gencorelli F, Lubarsky DA: Changing medical group behaviors: Increasing the rate of documentation of quality assurance events using an anesthesia information system. *Anesth Analg* 2006; 103:390–5
33. Madsen PM, Desai VM, Roberts KH, Wong D: Mitigating hazards through continuing design: The birth and evolution of a pediatric intensive care unit. *Organization Science* 2006; 17:239–48
34. Davidoff F: Systems of service: Reflections on the moral foundations of improvement. *BMJ Qual Saf* 2011; 20(suppl 1):i5–10
35. Kotter JP: *Organizational Dynamics: Diagnosis and Intervention*. Reading, Massachusetts, Addison-Wesley, 1978
36. Kotter JP: *Power in Management*. New York, AMACOM, 1979
37. Kotter JP: *Leading Change*. Boston, Harvard Business School Press, 1996
38. Kotter JP, Whitehead LA: *Buy-in: Saving Your Good Idea from Being Shot Down*. Boston, Harvard Business Review Press, 2010
39. Gneezy U, Meier S, Rey-Biel P: When and why incentives (don't) work to modify behavior. *J Econ Perspect* 2011; 25:191–210
40. Hoorens V: Self-enhancement and superiority biases in social comparison. *ERSP* 1993; 4:113–39
